# Supplementary material
Source: publisher figshare collection journal article supplement (https://plos.figshare.com/articles/dataset/_/3133078)
Supplement: Supplementary file [file 1]

**Table S1 - Tasseled Cap coefficients for surface reflectance data**

**Coefficients used to transform reflectance bands from all Landsat sensors into tasseled cap indices.**

|                  | B       | G      | R       | NIR    | SWIR1   | SWIR2   |
|------------------|---------|--------|---------|--------|---------|---------|
| TCB ( <i>b</i> ) | 0.2043  | 0.4158 | 0.5524  | 0.5741 | 0.3124  | 0.2303  |
| TCG ( <i>g</i> ) | -0.1603 | 0.2819 | -0.4934 | 0.7940 | -0.0002 | -0.1446 |
| TCW ( <i>w</i> ) | 0.0315  | 0.2021 | 0.3102  | 0.1594 | -0.6806 | -0.6109 |
