# Supplementary material
Source: publisher figshare collection journal article supplement (https://plos.figshare.com/articles/dataset/_/3133078)
Supplement: Supplementary file [file 1]

**Table S2 - Random forest importance scores**

Random forest scores based on overall accuracies and class accuracies for deforestation (DEF), degradation (DEG), no-change (NOCH). Spectral bands are shown from highest to lowest overall importance scores.

| Band  | Overall | DEF   | DEG   | NOCH  |
|-------|---------|-------|-------|-------|
| SWIR2 | 0.986   | 1     | 0.795 | 0.769 |
| TCW   | 0.937   | 0.655 | 0.892 | 0.951 |
| NDMI  | 0.818   | 0.737 | 0.652 | 0.662 |
| TCA   | 0.747   | 0.794 | 0.764 | 0.266 |
| R     | 0.689   | 0.923 | 0.305 | 0.644 |
| NDVI  | 0.645   | 0.424 | 0.723 | 0.482 |
| G     | 0.529   | 0.617 | 0.059 | 0.967 |
| NBR   | 0.475   | 0.569 | 0.348 | 0.432 |
| SWIR1 | 0.401   | 0.491 | 0.027 | 0.845 |
| TCB   | 0.237   | 0.283 | 0.281 | 0.159 |
| B     | 0.219   | 0.006 | 0.521 | 0.282 |
| NBR2  | 0.163   | 0.093 | 0.171 | 0.466 |
| TCG   | 0.154   | 0.144 | 0.957 | 0.077 |
| NIR   | 0.001   | 0.264 | 0.503 | 0     |
